# Supplementary material for: Mechanisms of Caspases 3/7/8/9 in the Degeneration of External Gills of Chinese Giant Salamanders (Andrias davidianus)
Source: MDPI journal article supplement (doi:10.3390/genes13081360), 2022-07-29
Supplement: s1 [file s1]

## Supporting information

Table S1. Information on sequences used in multiple sequence alignment.

| Species                       | Accession number |
|-------------------------------|------------------|
| <b>Caspase3</b>               |                  |
| <i>Mus musculus</i>           | AAC53196.1       |
| <i>Homo sapiens</i>           | CAC88866.1       |
| <i>Danio rerio</i>            | AAH78310.1       |
| <i>Xenopus laevis</i>         | NP_001081225.1   |
| <i>Oryzias latipes</i>        | NP_001098140.1   |
| <i>Xenopus tropicalis</i>     | NP_001120900.1   |
| <i>Ictalurus punctatus</i>    | NP_001188010.1   |
| <i>Alligator sinensis</i>     | XP_025063386.1   |
| <i>Microcaecilia unicolor</i> | XP_030047368.1   |
| <b>Caspase7</b>               |                  |
| <i>Xenopus tropicalis</i>     | NP_001016299.1   |
| <i>Danio rerio</i>            | NP_001018443.1   |
| <i>Chrysemys picta bellii</i> | XP_005293940.1   |
| <i>Homo sapiens</i>           | XP_016872253.1   |
| <i>Nanorana parkeri</i>       | XP_018419982.1   |
| <i>Rhinatrema bivittatum</i>  | XP_029466303.1   |
| <i>Microcaecilia unicolor</i> | XP_030058570.1   |
| <i>Thamnophis elegans</i>     | XP_032081709.1   |
| <i>Mus musculus</i>           | XP_006526679.3   |
| <b>Caspase8</b>               |                  |
| <i>Mus musculus</i>           | NP_033942.1      |
| <i>Danio rerio</i>            | NP_571585.2      |
| <i>Oryzias latipes</i>        | NP_001098258.1   |
| <i>Oncorhynchus mykiss</i>    | NP_001268251.1   |
| <i>Homo sapiens</i>           | XP_005246949.1   |
| <i>Chrysemys picta bellii</i> | XP_005306306.1   |
| <i>Rhinatrema bivittatum</i>  | XP_029462103.1   |
| <i>Xenopus tropicalis</i>     | XP_017953067.2   |
| <i>Chelonia mydas</i>         | XP_037768405.1   |
| <b>Caspase9</b>               |                  |
| <i>Homo sapiens</i>           | P55211.3         |
| <i>Mus musculus</i>           | CAJ18606.1       |
| <i>Oncorhynchus mykiss</i>    | NP_001118119     |
| <i>Danio rerio</i>            | NP_001007405.2   |
| <i>Chrysemys picta bellii</i> | XP_005293057.1   |
| <i>Nanorana parkeri</i>       | XP_018424267.1   |
| <i>Rhinatrema bivittatum</i>  | XP_029434788.1   |
| <i>Microcaecilia unicolor</i> | XP_030041780.1   |
| <i>Chelonia mydas</i>         | XP_037737237.1   |

Table S2. Information on sequences used in phylogeny.

| Species                         | Accession number |
|---------------------------------|------------------|
| <b>Caspase3</b>                 |                  |
| <i>Anas platyrhynchos</i>       | XM_027456288.1   |
| <i>Capra hircus</i>             | NM_001286089.1   |
| <i>Chelonia mydas</i>           | XM_007054464.2   |
| <i>Chrysemys picta bellii</i>   | XM_005281973.3   |
| <i>Cynops orientalis</i>        | JQ320088.1       |
| <i>Dromaius novaehollandiae</i> | XM_026105278.1   |
| <i>Gallus gallus</i>            | NM_204725.1      |
| <i>Homo sapiens</i>             | NM_004346.4      |
| <i>Ictalurus punctatus</i>      | XM_017473312.1   |
| <i>Microcaecilia unicolor</i>   | XM_030191508.1   |
| <i>Mus musculus</i>             | XM_017312543.3   |
| <i>Oncorhynchus mykiss</i>      | AB477342.1       |
| <i>Ornithorhynchus anatinus</i> | XM_029076645.1   |
| <i>Oryzias latipes</i>          | NM_001104670.1   |
| <i>Parus major</i>              | XM_015624463.3   |
| <i>Protopterus annectens</i>    | XM_044089855.1   |
| <i>Protopterus annectens</i>    | XM_044089854.1   |
| <i>Rana catesbeiana</i>         | BT081679.1       |
| <i>Takifugu rubripes</i>        | AY102865.1       |
| <i>Thamnophis elegans</i>       | XM_032224719.1   |
| <i>Xenopus laevis</i>           | NM_001097686.1   |
| <i>Xenopus laevis</i>           | XM_018234069.2   |
| <i>Xenopus laevis</i>           | XM_018251735.2   |
| <b>Caspase7</b>                 |                  |
| <i>Anas platyrhynchos</i>       | XM_027459864.2   |
| <i>Bufo gargarizans</i>         | XM_044296926.1   |
| <i>Bufo gargarizans</i>         | XM_044296925.1   |
| <i>Chrysemys picta bellii</i>   | XM_005293883.3   |
| <i>Cynoglossus semilaevis</i>   | XM_025057176.1   |
| <i>Cynops orientalis</i>        | JQ320087.1       |
| <i>Danio rerio</i>              | NM_001020607.1   |
| <i>Gallus gallus</i>            | XM_421764.5      |
| <i>Homo sapiens</i>             | XM_017016764.1   |
| <i>Microcaecilia unicolor</i>   | XM_030202710.1   |
| <i>Molothrus ater</i>           | XM_036385684.1   |
| <i>Mus musculus</i>             | NM_007611.2      |
| <i>Nanorana parkeri</i>         | XM_018564480.1   |
| <i>Orcinus orca</i>             | XM_004265822.2   |
| <i>Oryctolagus cuniculus</i>    | XM_017348571.1   |
| <i>Pogona vitticeps</i>         | XM_020779907.1   |
| <i>Protopterus annectens</i>    | XM_044055765.1   |

|                                 |                   |
|---------------------------------|-------------------|
| <i>Pseudonaja textilis</i>      | XM_026704804.1    |
| <i>Rhinatrema bivittatum</i>    | XM_029610443.1    |
| <i>Xenopus laevis</i>           | NM_001097803.1    |
| <i>Xenopus laevis</i>           | NM_001087939.1    |
| <i>Xenopus laevis</i>           | XM_041568399.1    |
| <i>Xenopus tropicalis</i>       | NM_001016299.2    |
| <i>Xenopus tropicalis</i>       | NM_001016299.2(2) |
| <i>Xenopus tropicalis</i>       | BC170775.1        |
| <i>Xenopus tropicalis</i>       | BC170801.1        |
| <i>Xenopus tropicalis</i>       | XM_031905081.1    |
| <i>Xenopus tropicalis</i>       | XM_031905082.1    |
| <b>Caspase8</b>                 |                   |
| <i>Catharus ustulatus</i>       | XM_033065450.1    |
| <i>Chelonia mydas</i>           | XM_037912477.1    |
| <i>Chrysemys picta bellii</i>   | XM_005306249.3    |
| <i>Danio rerio</i>              | NM_131510.2       |
| <i>Gallus gallus</i>            | NM_204592.3       |
| <i>Homo sapiens</i>             | XM_005246892.2    |
| <i>Lynx canadensis</i>          | XM_030325757.2    |
| <i>Mus musculus</i>             | NM_009812.2       |
| <i>Oncorhynchus mykiss</i>      | NM_001281322.1    |
| <i>Oryzias latipes</i>          | NM_001104788.1    |
| <i>Oxyura jamaicensis</i>       | XM_035332072.1    |
| <i>Rhinatrema bivittatum</i>    | XM_029606243.1    |
| <i>Scophthalmus maximus</i>     | XM_035635876.1    |
| <i>Tursiops truncatus</i>       | XM_019939136.2    |
| <i>Xenopus laevis</i>           | NM_001085565.1    |
| <i>Xenopus tropicalis</i>       | XM_018097578.2    |
| <b>Caspase9</b>                 |                   |
| <i>Anas platyrhynchos</i>       | XM_038166520.1    |
| <i>Chelonia mydas</i>           | XM_037881309.1    |
| <i>Chrysemys picta bellii</i>   | XM_005293000.3    |
| <i>Danio rerio</i>              | NM_001007404.2    |
| <i>Gallus gallus</i>            | XM_424580.6       |
| <i>Homo sapiens</i>             | NM_032996.3       |
| <i>Microcaecilia unicolor</i>   | XM_030185920.1    |
| <i>Mus musculus</i>             | CT010400.1        |
| <i>Oncorhynchus mykiss</i>      | NM_001124647.1    |
| <i>Oncorhynchus nerka</i>       | XM_029622430.1    |
| <i>Ornithorhynchus anatinus</i> | XM_029066662.1    |
| <i>Podarcis muralis</i>         | XM_028740558.1    |
| <i>Scophthalmus maximus</i>     | XM_035644988.1    |
| <i>Serinus canaria</i>          | XM_018924683.2    |
| <i>Vombatus ursinus</i>         | XM_027859817.1    |

|                           |                |
|---------------------------|----------------|
| <i>Xenopus laevis</i>     | NM_001085566.1 |
| <i>Xenopus tropicalis</i> | NM_001123463.1 |
| <i>Xenopus tropicalis</i> | XM_031904803.1 |

---

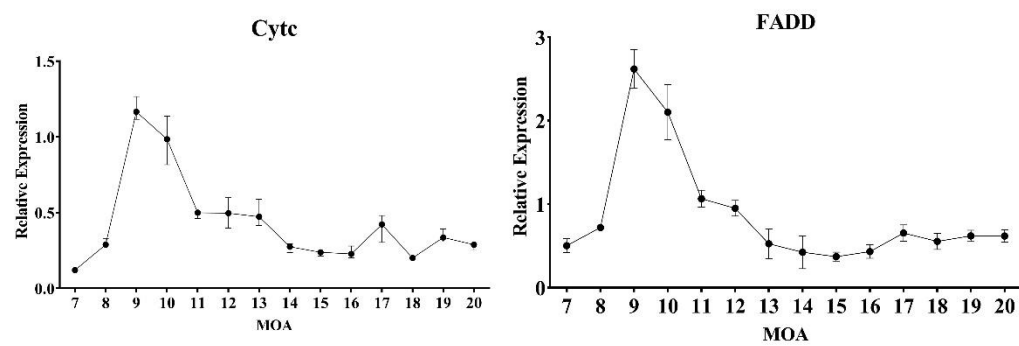

Figure S1. The expression trend of FADD and Cytc genes in the external gill of Chinese giant salamander during metamorphosis
